# Supplementary material for: Cinnamon subcritical water extract attenuates intestinal inflammation and enhances intestinal tight junction in a Caco-2 and RAW264.7 co-culture model
Source: Royal Society of Chemistry journal article supplement (doi:10.1039/c9fo00302a), 2019-01-01
Supplement: c9fo00302a1.pdf [file c9fo00302a1.pdf]

### Supplementary Information

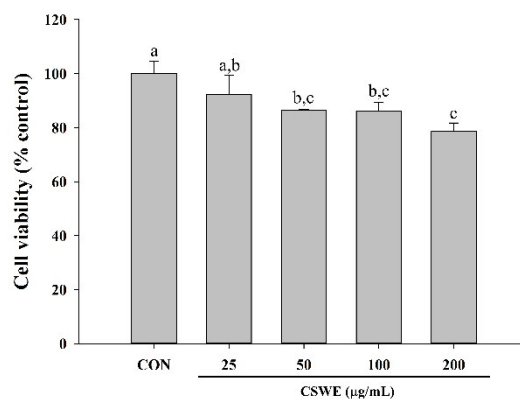

**Figure S1.** Cell viability of cinnamon subcritical water extract (CSWE) on MTT. Caco-2 cells were cultured in 96 well plates at a density of  $1 \times 10^5$  cells per well. CSWE were added to the cells and incubated for 72 h. The colorimetric determination of cell viability was performed by adding 20  $\mu$ L MTT solution (5 mg/mL) to each well. After 2 h of incubation, the supernatant was aspirated, and 100  $\mu$ L DMSO was added to dissolve the formazan crystal. The optical intensity of color (absorbance) was measured at 560 nm. Cytotoxicity was expressed as the relative viability (% control). Different letters above the bars indicate significant differences (Duncan's multiple range test;  $p < 0.05$ ). CON control
